# Supplementary material for: Soft topographical patterns trigger a stiffness-dependent cellular response to contact guidance
Source: bioRxiv or medRxiv preprint supplement (doi:10.1101/2022.01.25.477731), 2022-01-27
Supplement: Supplementary file [file media-1.pdf]

**Supplementary Materials for**  
**Soft topographical patterns trigger a stiffness-dependent cellular response to contact guidance.**

Jordi Comelles\*, Vanesa Fernández-Majada, Verónica Acevedo, Beatriz Rebollo-Calderon,  
Elena Martínez\*

\* Co-corresponding authors: [emartinez@ibecbarcelona.eu](mailto:emartinez@ibecbarcelona.eu); [jcomelles@ibecbarcelona.eu](mailto:jcomelles@ibecbarcelona.eu)

**This PDF file includes:**

Figs. S1 to S7  
Tables S1 to S14  
Movies S1 to S4

**Other Supplementary Materials for this manuscript include the following:**

Movies S1 to S4

**Fig. S1.**

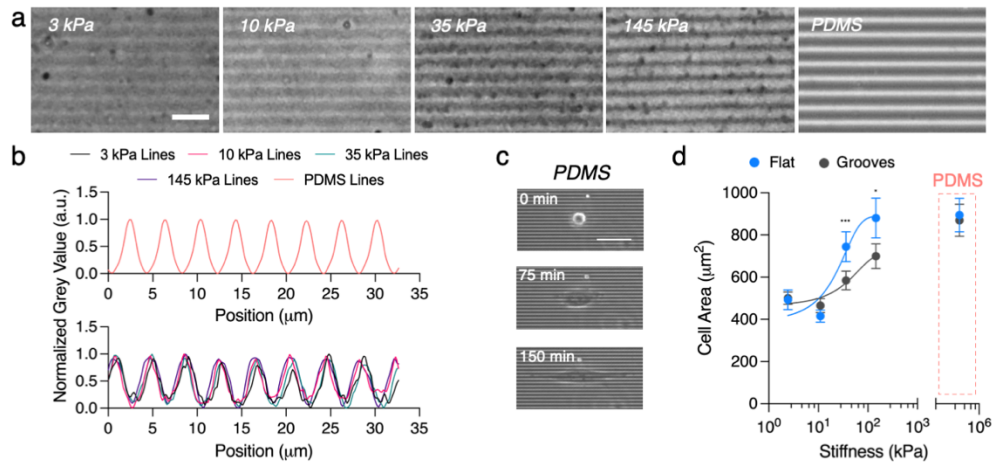

**Fig. S1.** (A) Phase contrast image of 2  $\mu\text{m}$  wide and 1  $\mu\text{m}$  high grooves on PAA gels of different stiffness and PDMS. Scale bar, 10  $\mu\text{m}$ . (B) Intensity profiles of the microstructured grooves for PDMS and PAA gels. (C) Snapshots of NIH 3T3 fibroblasts adhering, elongating and aligning on PDMS grooves. Scale bar, 35  $\mu\text{m}$ . (D) Cell area versus substrate stiffness. See Table S1 for the number of cells and experiments. Data points (Mean  $\pm$  CI) were fitted as an eye-guide. Statistical significance was assessed by Tukey's tests.

**Fig. S2.**

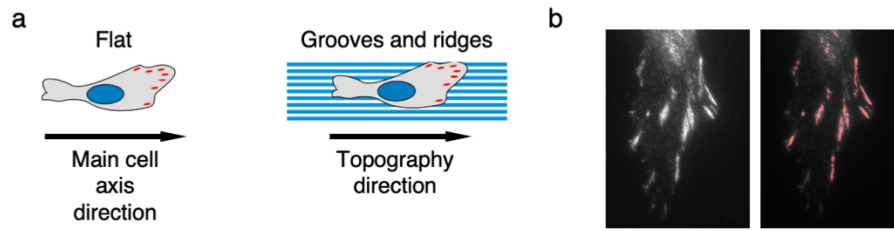

**Fig. S2.** (A) Schematics depicting the reference used to evaluate focal adhesion alignment on flat and grooved substrates. (B) Representative image of the detection of focal adhesion used to determine area and orientation.

**Fig. S3.**

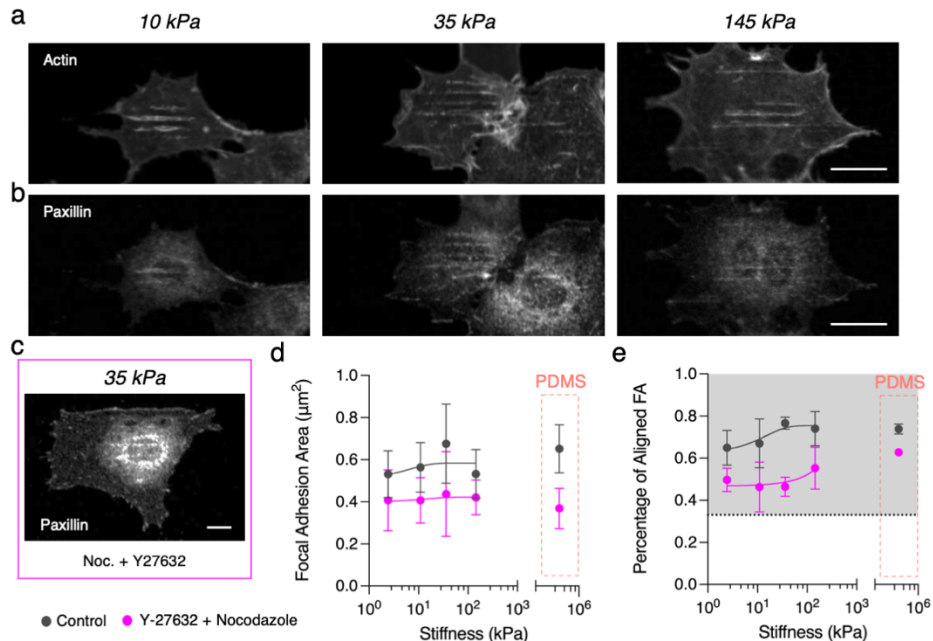

**Fig. S3.** Representative images of cells treated with Y-27632 and nocodazole on grooves of increasing stiffness. (A) F-actin (phalloidin) and (B) paxillin. Scale bar, 20  $\mu\text{m}$ . (C) Paxillin immunostaining of fibroblast treated with 20  $\mu\text{M}$  Y-27632 and 1  $\mu\text{M}$  nocodazole on 2  $\mu\text{m}$  wide grooves of 35 kPa. Scale bar, 20  $\mu\text{m}$ . (D) Focal adhesion area and (E) percentage of aligned focal adhesions as a function of increasing groove stiffness. Grey area in (E) corresponds to values above the expected for a random distribution. See Tables S9 for the number of cells and experiments.

**Fig. S4.**

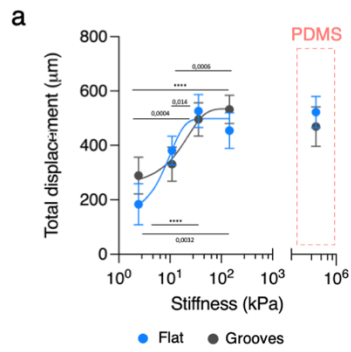

**Fig. S4. (A)** Total displacement of cells migrating for 6h on substrates of different stiffness. See Tables S10 for the number of cells and experiments. Data points (Mean  $\pm$  CI) were fitted as an eye-guide. Statistical significance was assessed by Tukey's tests (**A**).

**Fig. S5.**

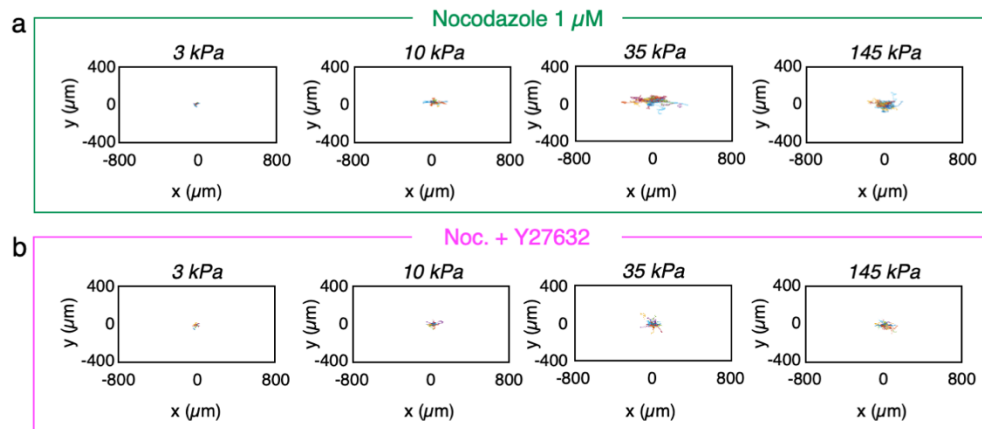

**Fig. S5. (A)** Trajectories of 3T3 fibroblasts treated with 1  $\mu\text{M}$  nocodazole and **(B)** 20  $\mu\text{M}$  Y-27632 and 1  $\mu\text{M}$  nocodazole on grooves of increasing stiffness.

**Fig. S6.**

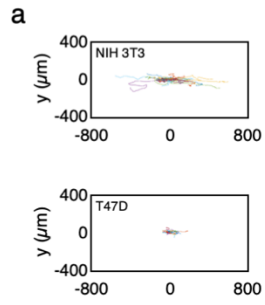

**Fig. S6. (A)** Trajectories of NIH 3T3 fibroblasts and T47D single cells migrating on grooved PDMS substrates.

**Fig. S7.**

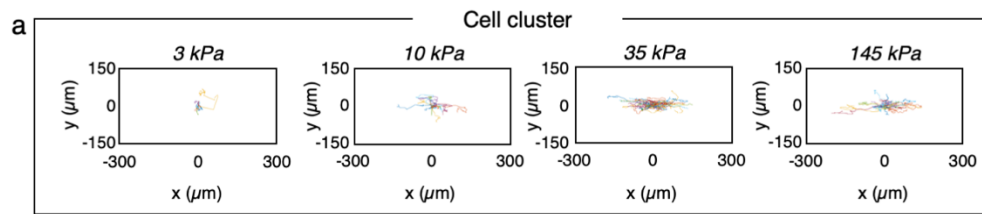

**Fig. S7. (A)** T47D clusters' trajectories on grooves of increasing stiffness.



**Table S1.****Table S1 – NIH 3T3 morphology**

| Stiffness (kPa) | Flat          |         | Grooves       |         |
|-----------------|---------------|---------|---------------|---------|
|                 | N experiments | n cells | N experiments | n cells |
| 3               | 3             | 52      | 5             | 116     |
| 10              | 5             | 57      | 10            | 114     |
| 35              | 6             | 94      | 8             | 134     |
| 145             | 4             | 67      | 5             | 124     |
| PDMS            | 4             | 133     | 6             | 184     |

**Table S2.****Table S2 – T47D morphology**

| Stiffness (kPa) | Flat          |         | Grooves       |         |
|-----------------|---------------|---------|---------------|---------|
|                 | N experiments | n cells | N experiments | n cells |
| 3               | 2             | 10      | 3             | 37      |
| 10              | 2             | 12      | 4             | 21      |
| 35              | 3             | 17      | 3             | 42      |
| 145             | 2             | 9       | 3             | 45      |
| PDMS            | 3             | 42      | 3             | 91      |

**Table S3.****Table S3 – NIH 3T3 focal adhesions**

| Stiffness (kPa) | Control       |         | Nocodazole+Y27632 |         |
|-----------------|---------------|---------|-------------------|---------|
|                 | N experiments | n cells | N experiments     | n cells |
| 3               | 4             | 21      | 2                 | 5       |
| 10              | 3             | 24      | 2                 | 11      |
| 35              | 4             | 15      | 2                 | 4       |
| 145             | 4             | 25      | 2                 | 25      |
| PDMS            | 5             | 25      | 2                 | 11      |

**Table S4.****Table S4 – NIH 3T3 – Y27632 morphology**

| Stiffness (kPa) | Flat          |         | Grooves       |         |
|-----------------|---------------|---------|---------------|---------|
|                 | N experiments | n cells | N experiments | n cells |
| 3               | 3             | 17      | 3             | 57      |
| 10              | 3             | 14      | 3             | 63      |
| 35              | 4             | 40      | 4             | 79      |
| 145             | 4             | 38      | 4             | 83      |
| PDMS            | 3             | 75      | 3             | 196     |

**Table S5.****Table S5 – NIH 3T3 actin profile**

| Stiffness (kPa) | Flat          |         | Grooves       |         |
|-----------------|---------------|---------|---------------|---------|
|                 | N experiments | n cells | N experiments | n cells |
| 3               | --            | --      | 4             | 31      |
| 10              | --            | --      | 3             | 35      |
| 35              | --            | --      | 3             | 39      |
| 145             | --            | --      | 3             | 36      |
| PDMS            | --            | --      | 4             | 28      |

**Table S6.****Table S6 – NIH 3T3 tubulin profile**

| Stiffness (kPa) | Flat          |         | Grooves       |         |
|-----------------|---------------|---------|---------------|---------|
|                 | N experiments | n cells | N experiments | n cells |
| 3               | --            | --      | 3             | 22      |
| 10              | --            | --      | 3             | 36      |
| 35              | --            | --      | 3             | 39      |
| 145             | --            | --      | 3             | 37      |
| PDMS            | --            | --      | 3             | 27      |

**Table S7.****Table S7 – NIH 3T3 – Nocodazole morphology**

| Stiffness (kPa) | Flat          |         | Grooves       |         |
|-----------------|---------------|---------|---------------|---------|
|                 | N experiments | n cells | N experiments | n cells |
| 3               | 3             | 16      | 3             | 88      |
| 10              | 4             | 51      | 5             | 102     |
| 35              | 3             | 30      | 5             | 95      |
| 145             | 3             | 13      | 4             | 63      |
| PDMS            | 3             | 37      | 3             | 137     |

**Table S8.****Table S8 – NIH 3T3 – Nocodazole+Y27632 morphology**

| Stiffness (kPa) | Flat          |         | Grooves       |         |
|-----------------|---------------|---------|---------------|---------|
|                 | N experiments | n cells | N experiments | n cells |
| 3               | 3             | 22      | 3             | 47      |
| 10              | 3             | 15      | 3             | 63      |
| 35              | 3             | 28      | 3             | 85      |
| 145             | 3             | 28      | 3             | 84      |
| PDMS            | 3             | 39      | 3             | 54      |



**Table S9.****Table S9 – NIH 3T3 focal adhesions**

| Stiffness (kPa) | Control       |         | Nocodazole+Y27632 |         |
|-----------------|---------------|---------|-------------------|---------|
|                 | N experiments | n cells | N experiments     | n cells |
| 3               | 4             | 21      | 2                 | 5       |
| 10              | 3             | 24      | 2                 | 11      |
| 35              | 4             | 15      | 2                 | 4       |
| 145             | 4             | 25      | 2                 | 25      |
| PDMS            | 5             | 25      | 2                 | 11      |

**Table S10.****Table S10 – NIH 3T3 migration**

| Stiffness (kPa) | Flat          |         | Grooves       |         |
|-----------------|---------------|---------|---------------|---------|
|                 | N experiments | n cells | N experiments | n cells |
| 3               | 4             | 13      | 3             | 24      |
| 10              | 4             | 23      | 5             | 24      |
| 35              | 5             | 31      | 5             | 65      |
| 145             | 4             | 21      | 3             | 69      |
| PDMS            | 4             | 30      | 3             | 31      |

**Table S11.****Table S11 – NIH 3T3 – Nocodazole migration**

| Stiffness (kPa) | Flat          |         | Grooves       |         |
|-----------------|---------------|---------|---------------|---------|
|                 | N experiments | n cells | N experiments | n cells |
| 3               | 4             | 11      | 3             | 15      |
| 10              | 4             | 17      | 3             | 28      |
| 35              | 4             | 28      | 3             | 49      |
| 145             | 3             | 24      | 3             | 38      |
| PDMS            | 4             | 25      | 3             | 25      |

**Table S12.****Table S12 – NIH 3T3 – Nocodazole+Y27632 migration**

| Stiffness (kPa) | Flat          |         | Grooves       |         |
|-----------------|---------------|---------|---------------|---------|
|                 | N experiments | n cells | N experiments | n cells |
| 3               | 2             | 13      | 2             | 32      |
| 10              | 2             | 10      | 2             | 52      |
| 35              | 2             | 26      | 2             | 67      |
| 145             | 2             | 25      | 2             | 46      |
| PDMS            | 2             | 16      | 2             | 29      |

**Table S13.****Table S13 – T47D migration**

| Stiffness (kPa) | Flat          |         |           | Grooves       |         |           |
|-----------------|---------------|---------|-----------|---------------|---------|-----------|
|                 | N experiments | n cells | n cluster | N experiments | n cells | n cluster |
| 3               | 2             | 8       | 19        | 3             | 14      | 7         |
| 10              | 2             | 13      | 16        | 4             | 41      | 19        |
| 35              | 3             | 4       | 5         | 3             | 47      | 66        |
| 145             | 2             | 5       | 13        | 3             | 34      | 34        |
| PDMS            | 3             | 18      | 22        | 3             | 45      | 24        |

**Table S14.****Table S14 – PAA gels formulation**

| Stiffness (kPa) | % Acrylamide | % Bis-acrylamide |
|-----------------|--------------|------------------|
| 3               | 7.5          | 0.050            |
| 10              | 7.5          | 0.075            |
| 35              | 12           | 0.150            |
| 145             | 12           | 0.600            |

**Movie S1.**

NIH 3T3 fibroblasts spreading on topographical grooves and ridges made of PAA gels of different stiffness (3 – 145 kPa). Time hh:mm. Scale bar 50  $\mu\text{m}$ .

**Movie S2.**

NIH 3T3 fibroblasts migrating on topographical grooves and ridges made of PAA gels of different stiffness (3 – 145 kPa). Time hh:mm. Scale bar 50  $\mu\text{m}$ .

**Movie S3.**

T47D single cell migrating on 35kPa topographical grooves and ridges. Time hh:mm. Scale bar 50  $\mu\text{m}$ .

**Movie S4.**

T47D cell cluster migrating on 35kPa topographical grooves and ridges. Time hh:mm. Scale bar 50  $\mu\text{m}$ .
